# Supplementary material for: miRNA-22 Upregulates Mtf1 in Dorsal Horn Neurons and Is Essential for Inflammatory Pain
Source: PubMed Central journal article supplement (PMC8886789; doi:10.1155/2022/8622388), 2022-02-10
Supplement: 8622388.f1.pdf [file 8622388.f1.pdf]

**Table 1. Mean changes in locomotor function.**

| Treatment groups              | Placing | Grasping | Righting |
|-------------------------------|---------|----------|----------|
| Sal + Scr                     | 5(0)    | 5(0)     | 5(0)     |
| Sal + 22-Ih                   | 5(0)    | 5(0)     | 5(0)     |
| CFA + Scr                     | 5(0)    | 5(0)     | 5(0)     |
| CFA + 22-Ih                   | 5(0)    | 5(0)     | 5(0)     |
| Sal + Vector                  | 5(0)    | 5(0)     | 5(0)     |
| Sal + LV-22                   | 5(0)    | 5(0)     | 5(0)     |
| CFA + Vector                  | 5(0)    | 5(0)     | 5(0)     |
| CFA + LV-22                   | 5(0)    | 5(0)     | 5(0)     |
| Scr                           | 5(0)    | 5(0)     | 5(0)     |
| 22-mics                       | 5(0)    | 5(0)     | 5(0)     |
| Vector                        | 5(0)    | 5(0)     | 5(0)     |
| Lenti-22                      | 5(0)    | 5(0)     | 5(0)     |
| Sal + si- <i>Mtfl</i>         | 5(0)    | 5(0)     | 5(0)     |
| CFA + si- <i>Mtfl</i>         | 5(0)    | 5(0)     | 5(0)     |
| Sal + <i>Mtfl</i> -shRNA      | 5(0)    | 5(0)     | 5(0)     |
| CFA + <i>Mtfl</i> -shRNA      | 5(0)    | 5(0)     | 5(0)     |
| 22-mics + si- <i>Mtfl</i>     | 5(0)    | 5(0)     | 5(0)     |
| Lenti-22 + <i>Mtfl</i> -shRNA | 5(0)    | 5(0)     | 5(0)     |
