# Supplementary material for: miRNA-22 Upregulates Mtf1 in Dorsal Horn Neurons and Is Essential for Inflammatory Pain
Source: PubMed Central journal article supplement (PMC8886789; doi:10.1155/2022/8622388), 2022-02-10

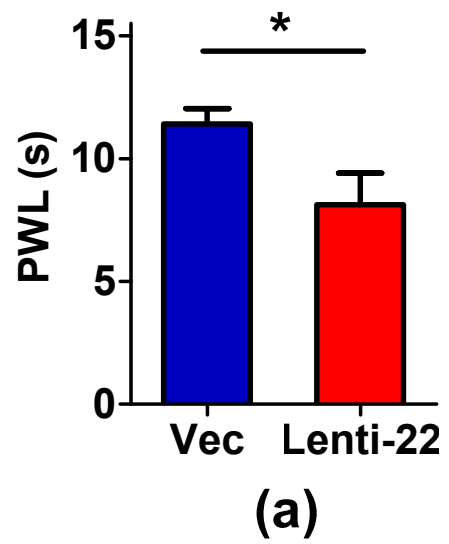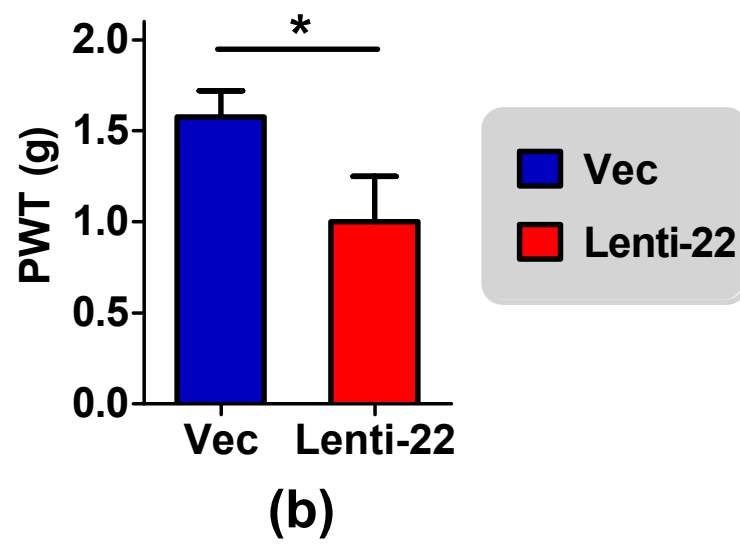

Supplement: 8622388.f2.pdf [file 8622388.f2.pdf]
